# Supplementary figures and images for: The positive effects and underlying mechanisms of Undaria pinnatifida polysaccharides on type 2 diabetes mellitus in rats
Source: Royal Society of Chemistry journal article supplement (doi:10.1039/d1fo01838h), 2021-01-01

Fig. S1 The IR spectra of UPP

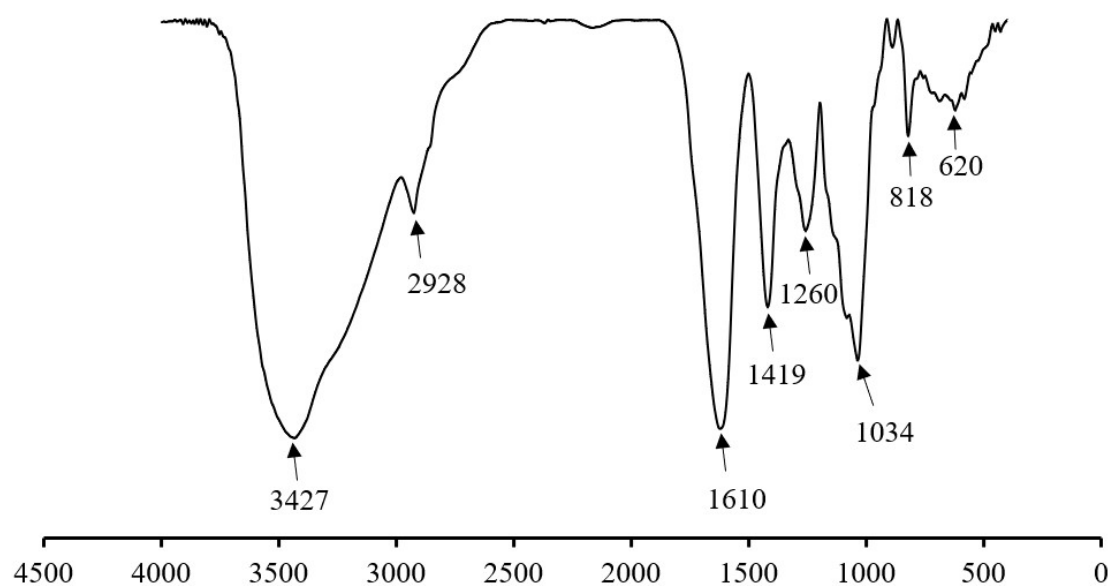

Supplement: d1fo01838h1.pdf [file d1fo01838h1.pdf]
